# Supplementary material for: Cationic organozinc complexes of a bis(phosphinimine) pincer ligand: synthesis, structural and polymerization studies
Source: Royal Society of Chemistry journal article supplement (doi:10.1039/b922543a), 2010-01-01
Supplement: b922543a.pdf [file b922543a.pdf]

Supporting Material for:

Cationic Organozinc Complexes of a New  
*bis*(phosphinimine) Pincer Ligand: Synthesis  
and Structural Studies

Craig A. Wheaton and Paul G. Hayes\*

Contribution from the Department of Chemistry and Biochemistry, University of  
Lethbridge, 4401 University Drive, Lethbridge, AB, T1K 3M4, Canada

**[4,6-(Mes-NPPh<sub>2</sub>)<sub>2</sub>dibenzofuran-ZnMe]<sup>+</sup>[BPh<sub>4</sub>]<sup>-</sup>, 2b**

Crystals of **2b** were grown by slow cooling of a solution of the compound in a mixture of benzene and bromobenzene from 70 °C to ambient temperature. The reflection data were consistent with the space group P(-1), and the structure was determined at a resolution of 0.84 Å. The asymmetric unit contained a single molecule of the compound. Most atoms are well ordered, with the exception of the methyl group on the zinc centre, which is disordered over two sites at a ratio of 70:30, and the nearest neighboring phenyl ring of the tetraphenylborate anion, which exhibits a concomitant two site disorder. The unit cell contains total solvent accessible voids of 255 Å<sup>3</sup> (7.6% of the unit cell), and accounting for this using the SQUEEZE subroutine of the PLATON software suite gave improved residuals. A total of 37 electrons were removed, and are assigned to 0.88 molecules of benzene (0.44 per molecules of benzene per asymmetric unit). The SQUEEZE processed data were used for all subsequent refinement cycles. The largest residual electron density peak (0.557 eÅ<sup>-3</sup>) is associated with the disordered methyl group. Full-matrix least squares refinement on F<sup>2</sup> gave R<sub>1</sub> = 0.0656 for 2σ data and wR<sub>2</sub> = 0.1777 for all data (GoF = 1.021).

**[4,6-(Mes-NPPh<sub>2</sub>)<sub>2</sub>dibenzofuran-ZnOAc]<sup>+</sup>[BPh<sub>4</sub>]<sup>-</sup>, 3.**

Crystals of **3** were grown by slow cooling a solution of the compound in a benzene/bromobenzene mixture from 100 °C to ambient temperature. The reflection data were consistent with the space group P2(1)/c, and was determined at a resolution of 0.84 Å. The asymmetric unit contained a single molecule of the compound. All non-solvent atoms in the unit cell are well ordered and have been refined anisotropically. Solvent accessible voids in the unit cell were accounted for using the SQUEEZE subroutine of the PLATON software suite, giving improved residuals. A total of 160 electrons were removed from a volume of 986 Å<sup>3</sup> (13.1% of the unit cell). These electrons have been assigned to 3.8 molecules of benzene (0.95 molecules of benzene per asymmetric unit). SQUEEZE processed data were used for all subsequent refinement cycles. The largest residual electron density peak (0.880 eÅ<sup>-3</sup>) is associated with a molecule of benzene. Full-matrix least squares refinement on F<sup>2</sup> gave R<sub>1</sub> = 0.0620 for 2σ data and wR<sub>2</sub> = 0.1544 for all data (GoF = 1.019).

**[4,6-(Ph-NPPh<sub>2</sub>)<sub>2</sub>dibenzofuran-ZnPh]<sup>+</sup>[BPh<sub>4</sub>]<sup>-</sup>, 4.**

Crystals of **4** were grown at ambient temperature from a bromobenzene solution containing the compound. The reflection data were consistent with the space group P2(1)/c, and the structure was determined at a resolution of 0.84 Å. The asymmetric unit contains a single molecule of the compound and a single well ordered molecule of bromobenzene solvent. All atoms are well ordered and have been refined anisotropically. The unit cell contains

solvent accessible voids which were accounted for using the SQUEEZE subroutine of the PLATON software suite. A total of 142 electrons were removed from a volume of 646 Å<sup>3</sup> (8.5% of the unit cell). These electrons are assigned to 1.9 molecules of bromobenzene (0.47 molecules of bromobenzene per asymmetric unit). The SQUEEZE processed data were used for all subsequent refinement cycles. The largest residual electron density peak (1.017 eÅ<sup>-3</sup>) is associated with the phenyl substituent of zinc. Full-matrix least squares refinement on F<sup>2</sup> gave R<sub>1</sub> = 0.0492 for 2σ data and wR<sub>2</sub> = 0.1410 for all data (GoF = 1.051).

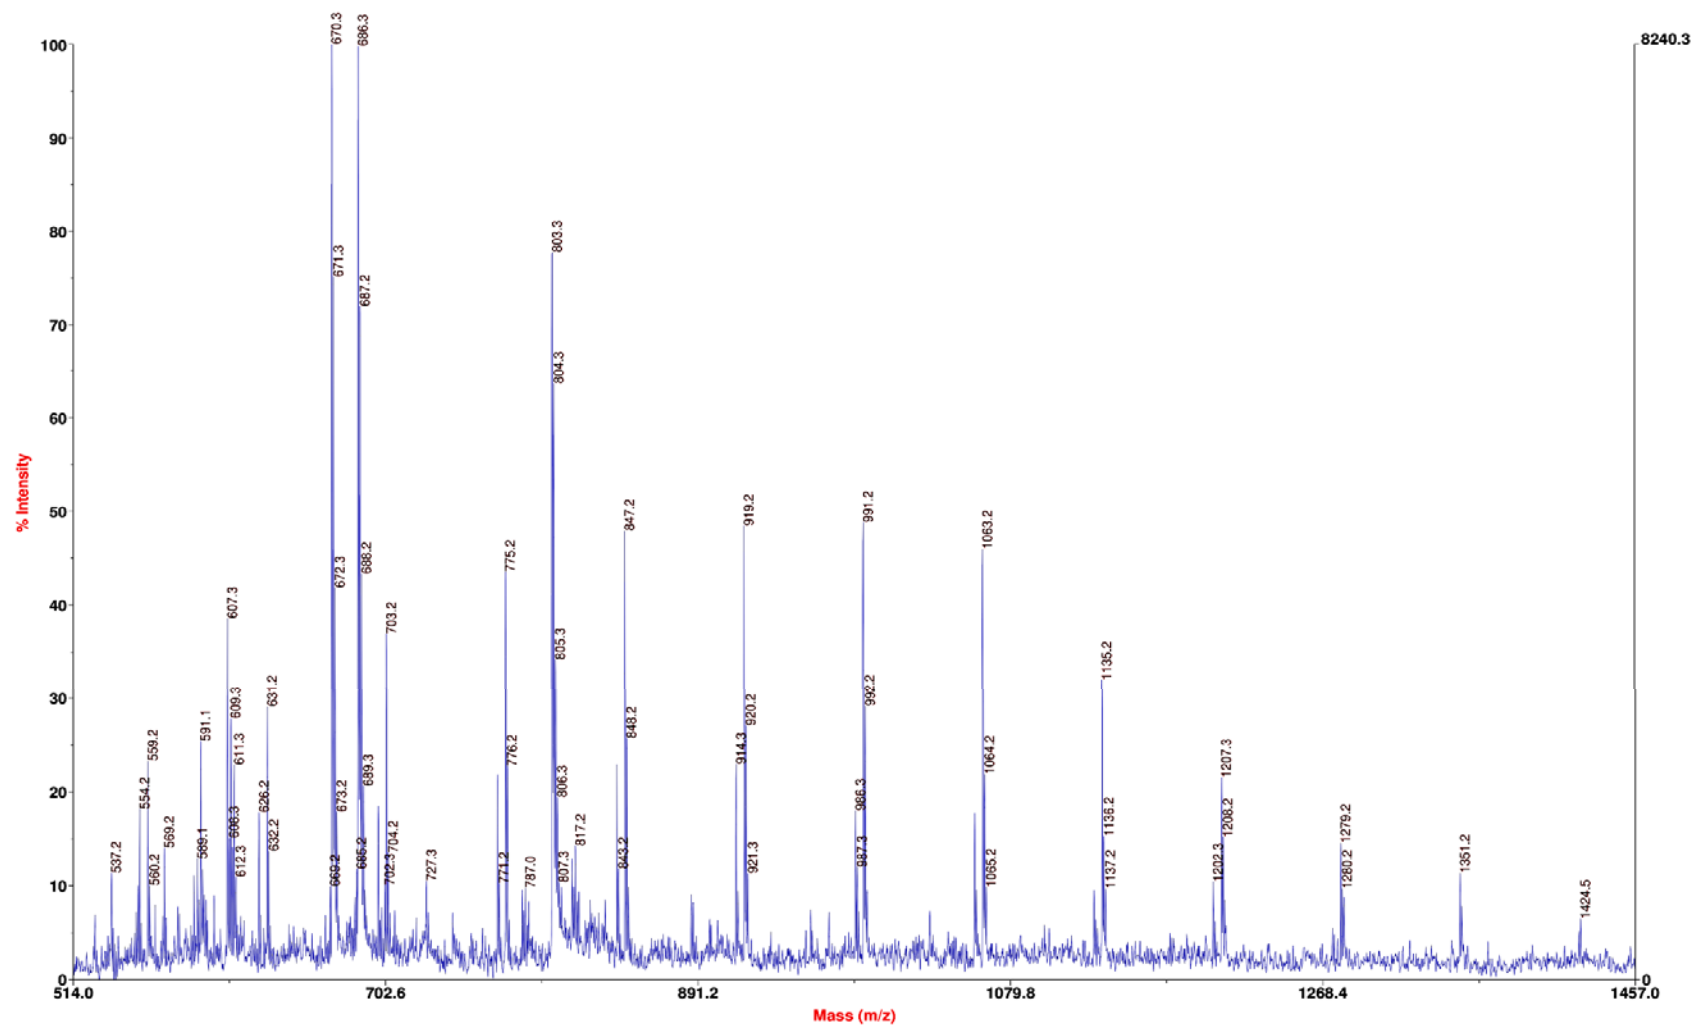

Figure 1. MALDI-TOF mass spectrum of polymer sample in the range m/z 514–1457.

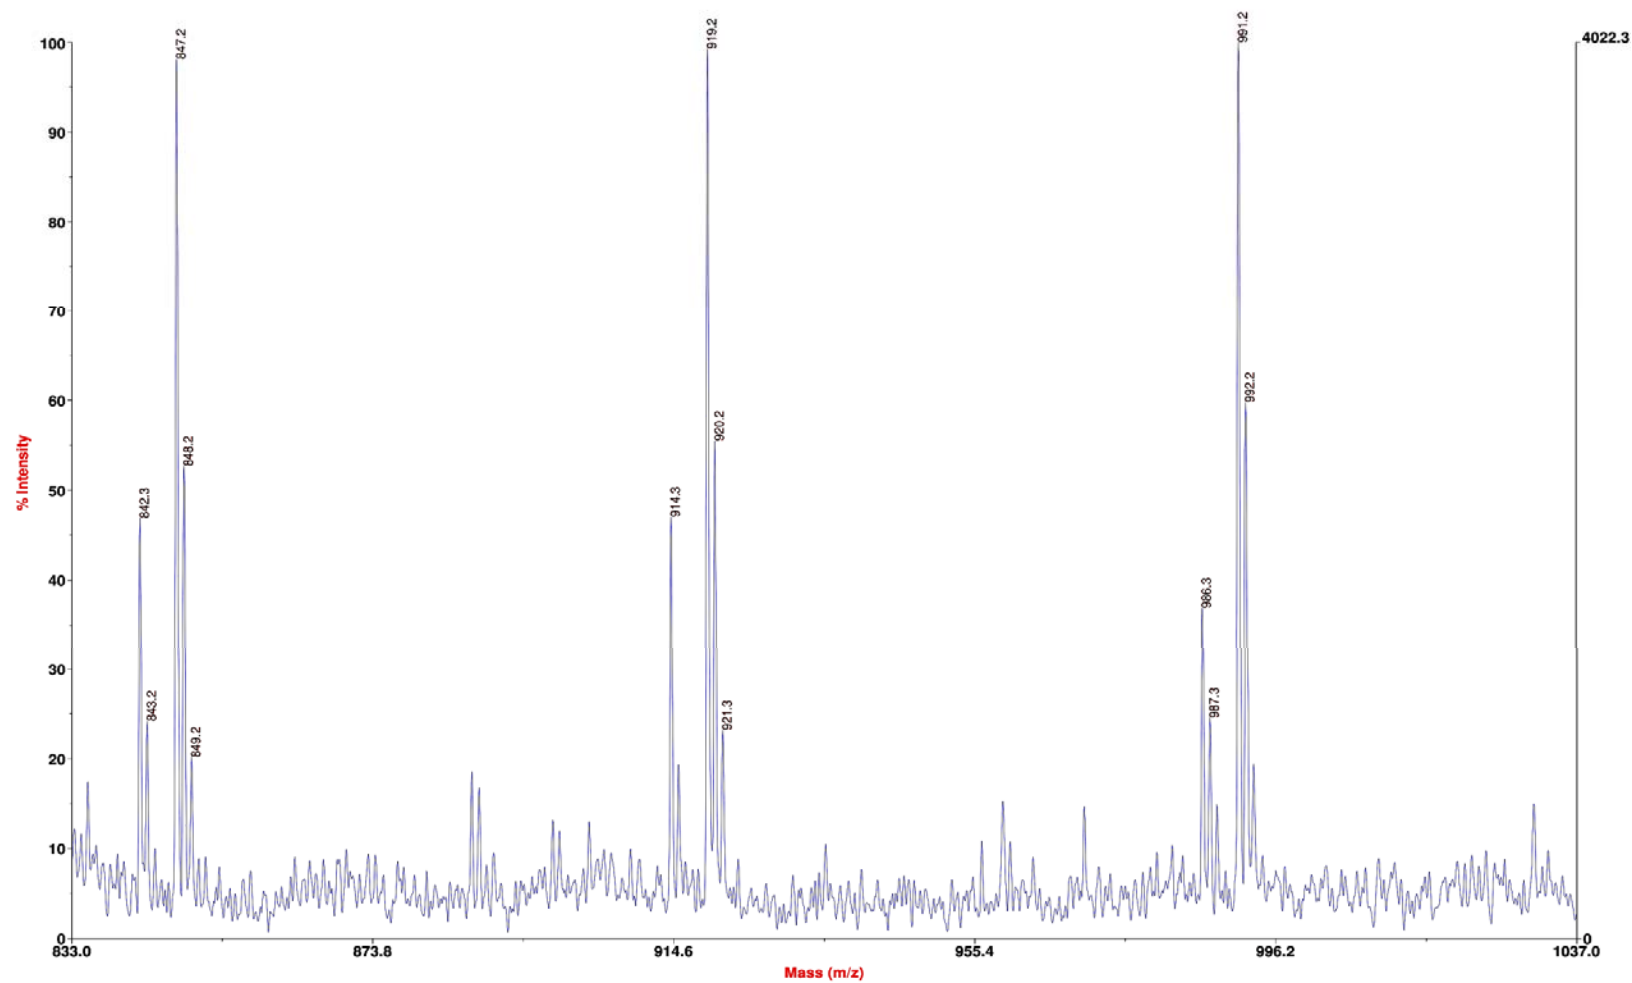

Figure 2. MALDI-TOF mass spectrum of polymer sample in the range  $m/z$  833–1037.

**PLA50 Injection volume 100ul**

|              |                                   |
|--------------|-----------------------------------|
| Sample       | 2010-01-13_20:38:44_PLA50_5_4mg_l |
| Mn           | 18,474                            |
| Mw           | 22,635                            |
| Mz           | 24,772                            |
| Mp           | 30,063                            |
| Mw/Mn        | 1.225                             |
| % Above      | 0.0000                            |
| % Below      | 0.0000                            |
| IV           | 0.3172                            |
| Rh           | 4.65                              |
| Rg           | 0.00                              |
| Wt Fr (Peak) | 1.0000                            |
| MH - a       | 0.314                             |
| MH - k       | -1.783                            |
| Bn           | 0.0000                            |
| Lambda       | 0.0000                            |
| Ave. dn/dc   | 0.0000                            |
| Ave. dA/dc   | 0.0000                            |
| Wt Fr (A)    | 0.0000                            |
| RI Area      | 250.85                            |
| UV Area      | 0.00                              |
| RALS Area    | 42.55                             |
| LALS Area    | 21.72                             |
| DP Area      | 203.27                            |
| Ret Vol      | 15.307                            |
| Ret Time     | 15.307                            |
| Above Mw     | 0                                 |
| Below Mw     | 0                                 |
| Peak Conc    | 1.0000                            |
| Pct Fr       | 0.0000                            |
| MW At Pct    | 0                                 |
| Ret Vol DP   | 15.118                            |
| Rh-z         | 4.92                              |

|          |                           |
|----------|---------------------------|
| ID       | PLA50 5_4mg               |
| Conc     | 1.0000                    |
| Recovery | 43.9324                   |
| dn/dc    | 0.2345                    |
| Method   | Jan 11Sossina 5-0004.v cm |

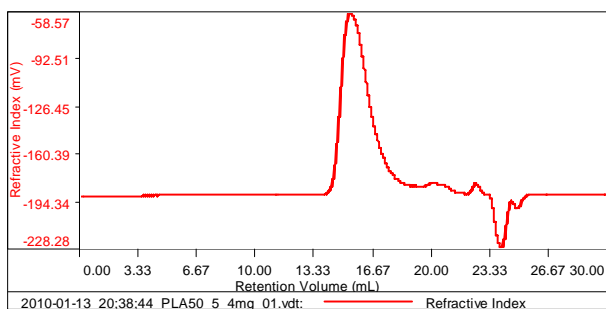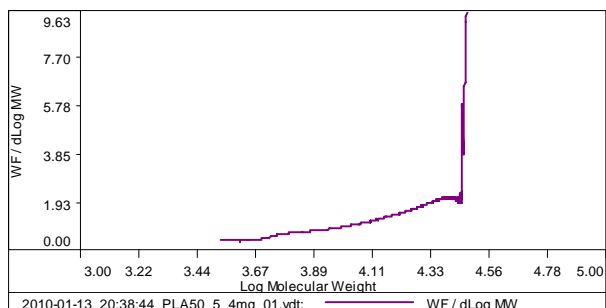

**PLA50 Injection volume 90ul**

|                     |                                   |                 |                           |
|---------------------|-----------------------------------|-----------------|---------------------------|
| <b>Sample</b>       | 2010-01-13_21:09:43_PLA50_5_4mg_l | <b>ID</b>       | PLA50 5_4mg               |
| <b>Mn</b>           | 17,693                            | <b>Conc</b>     | 1.0000                    |
| <b>Mw</b>           | 22,541                            | <b>Recovery</b> | 43.9502                   |
| <b>Mz</b>           | 24,775                            | <b>dn/dc</b>    | 0.2345                    |
| <b>Mp</b>           | 30,095                            | <b>Method</b>   | Jan 11Sossina 5-0004.v cm |
| <b>Mw/Mn</b>        | 1.274                             |                 |                           |
| <b>% Above</b>      | 0.0000                            |                 |                           |
| <b>% Below</b>      | 0.0000                            |                 |                           |
| <b>IV</b>           | 0.3200                            |                 |                           |
| <b>Rh</b>           | 4.65                              |                 |                           |
| <b>Rg</b>           | 0.00                              |                 |                           |
| <b>Wt Fr (Peak)</b> | 1.0000                            |                 |                           |
| <b>MH - a</b>       | 0.107                             |                 |                           |
| <b>MH - k</b>       | -0.890                            |                 |                           |
| <b>Bn</b>           | 0.0000                            |                 |                           |
| <b>Lambda</b>       | 0.0000                            |                 |                           |
| <b>Ave. dn/dc</b>   | 0.0000                            |                 |                           |
| <b>Ave. dA/dc</b>   | 0.0000                            |                 |                           |
| <b>Wt Fr (A)</b>    | 0.0000                            |                 |                           |
| <b>RI Area</b>      | 225.86                            |                 |                           |
| <b>UV Area</b>      | 0.00                              |                 |                           |
| <b>RALS Area</b>    | 38.09                             |                 |                           |
| <b>LALS Area</b>    | 19.41                             |                 |                           |
| <b>DP Area</b>      | 184.19                            |                 |                           |
| <b>Ret Vol</b>      | 15.287                            |                 |                           |
| <b>Ret Time</b>     | 15.287                            |                 |                           |
| <b>Above Mw</b>     | 0                                 |                 |                           |
| <b>Below Mw</b>     | 0                                 |                 |                           |
| <b>Peak Conc</b>    | 1.0000                            |                 |                           |
| <b>Pct Fr</b>       | 0.0000                            |                 |                           |
| <b>MW At Pct</b>    | 0                                 |                 |                           |
| <b>Ret Vol DP</b>   | 15.115                            |                 |                           |
| <b>Rh-z</b>         | 4.92                              |                 |                           |

  

|                                                                 |                                                             |
|-----------------------------------------------------------------|-------------------------------------------------------------|
| <p>2010-01-13 21:09:43 PLA50 5_4mg_01.vdt: Refractive Index</p> | <p>2010-01-13 21:09:43 PLA50 5_4mg_01.vdt: WF / dLog MW</p> |
|-----------------------------------------------------------------|-------------------------------------------------------------|
